# Supplementary material
Source: ML conference proceedings conference paper supplement (https://openaccess.thecvf.com/content/CVPR_2020/html/Karnewar_MSG-GAN_Multi-Scale_Gradients_CVPR_2020_paper.html)
Supplement: Supplementary file 1 [file Karnewar_MSG-GAN_Multi-Scale_Gradients_CVPR_2020_supplemental.pdf]

# MSG-GAN: Multi-Scale Gradients for Generative Adversarial Networks

## Supplementary Material

Animesh Karnewar  
TomTom

animesh.karnewar@tomtom.com

Oliver Wang  
Adobe Research

owang@adobe.com

| Block        | Operation     | Act.  | Output Shape     |
|--------------|---------------|-------|------------------|
| 1.           | Latent Vector | Norm  | 512 x 1 x 1      |
|              | Conv 4 x 4    | LReLU | 512 x 4 x 4      |
|              | Conv 3 x 3    | LReLU | 512 x 4 x 4      |
| 2.           | Upsample      | -     | 512 x 8 x 8      |
|              | Conv 3 x 3    | LReLU | 512 x 8 x 8      |
|              | Conv 3 x 3    | LReLU | 512 x 8 x 8      |
| 3.           | Upsample      | -     | 512 x 16 x 16    |
|              | Conv 3 x 3    | LReLU | 512 x 16 x 16    |
|              | Conv 3 x 3    | LReLU | 512 x 16 x 16    |
| 4.           | Upsample      | -     | 512 x 32 x 32    |
|              | Conv 3 x 3    | LReLU | 512 x 32 x 32    |
|              | Conv 3 x 3    | LReLU | 512 x 32 x 32    |
| Model 1 ↑    |               |       |                  |
| 5.           | Upsample      | -     | 512 x 64 x 64    |
|              | Conv 3 x 3    | LReLU | 256 x 64 x 64    |
|              | Conv 3 x 3    | LReLU | 256 x 64 x 64    |
| 6.           | Upsample      | -     | 256 x 128 x 128  |
|              | Conv 3 x 3    | LReLU | 128 x 128 x 128  |
|              | Conv 3 x 3    | LReLU | 128 x 128 x 128  |
| Model 2 ↑    |               |       |                  |
| 7.           | Upsample      | -     | 128 x 256 x 256  |
|              | Conv 3 x 3    | LReLU | 64 x 256 x 256   |
|              | Conv 3 x 3    | LReLU | 64 x 256 x 256   |
| Model 3 ↑    |               |       |                  |
| 8.           | Upsample      | -     | 64 x 512 x 512   |
|              | Conv 3 x 3    | LReLU | 32 x 512 x 512   |
|              | Conv 3 x 3    | LReLU | 32 x 512 x 512   |
| 9.           | Upsample      | -     | 32 x 1024 x 1024 |
|              | Conv 3 x 3    | LReLU | 16 x 1024 x 1024 |
|              | Conv 3 x 3    | LReLU | 16 x 1024 x 1024 |
| Model full ↑ |               |       |                  |

Table 1: Generator architecture for the MSG-ProGAN models used in training.

## 1. Architecture Details

**MSG-ProGAN** Tables 1 and 2 provide the detailed configurations of the generator and the discriminator of MSG-ProGAN respectively. After every block in the generator, a  $1 \times 1$  conv layer is used to convert the output activation volume into an RGB image which is passed onto the discriminator. On the discriminator’s side, these RGB images are combined with straight path activation volumes us-

ing the combine function  $\phi$ . In case of  $\phi_{simple}$ , a simple channelwise concatenation operation is used (see Table 2). For the  $\phi_{lin\_cat}$  variant of the combine function, a  $1 \times 1$  conv layer is used to project the RGB images into activation space which is then followed by channelwise concatenation operation. The number of channels output by the  $1 \times 1$  conv layer is equal to half of the output channels in that block of the discriminator, e.g. for block 3 (see Table 2), the output of the  $1 \times 1$  conv layer is  $32 \times 256 \times 256$  and the output of  $\phi_{lin\_cat}$  operation is  $96 \times 256 \times 256$  ( $32 + 64$ ). Finally, for the  $\phi_{cat\_lin}$ , the RGB images are first concatenated with the straight path activation volumes followed by a  $1 \times 1$  conv layer. The number of channels output by this  $1 \times 1$  conv layer is again equal to the prevalent number of channels in that block (e. g. 64 for block 3).

*Model 1*, *Model 2* and *Model 3* blocks of the generator (Tab 1) are used to synthesize  $32 \times 32$ ,  $128 \times 128$  and  $256 \times 256$  sized images respectively. And, after every  $3 \times 3$  conv operation the feature vectors are normalized according to the PixNorm [1] scheme (only for the generator).

**MSG-StyleGAN** The MSG-StyleGAN model uses all the modifications proposed by StyleGAN [2] to the ProGANs [1] architecture except the mixing regularization. Similar to MSG-ProGAN, we use a  $1 \times 1$  conv layer to obtain the RGB images output from every block of the StyleGAN generator leaving everything else (mapping network, non-traditional input and style adaIN) untouched. The discriminator architecture is same as the ProGANs (and consequently MSG-ProGAN, Tab. 2) discriminator.

## 2. Additional Qualitative Results

Here we include additional results for further empirical validation. We show full resolution results from MSG-StyleGAN for the  $256 \times 256$  Oxford102 flower dataset, and the MSG-ProGAN architecture for the  $128 \times 128$  CelebA and LSUN bedroom datasets. The CelebA model was trained for 28M real images and obtained an FID of

| Block        | Operation               | Act.   | Output Shape     |
|--------------|-------------------------|--------|------------------|
| Model full ↓ |                         |        |                  |
| 1.           | Raw RGB images 0        | -      | 3 x 1024 x 1024  |
|              | FromRGB 0               | -      | 16 x 1024 x 1024 |
|              | MinBatchStd             | -      | 17 x 1024 x 1024 |
|              | Conv 3 x 3              | LReLU  | 16 x 1024 x 1024 |
|              | Conv 3 x 3              | LReLU  | 32 x 1024 x 1024 |
| 2.           | AvgPool                 | -      | 32 x 512 x 512   |
|              | Raw RGB images 1        | -      | 3 x 512 x 512    |
|              | Concat/ $\phi_{simple}$ | -      | 35 x 512 x 512   |
|              | MinBatchStd             | -      | 36 x 512 x 512   |
|              | Conv 3 x 3              | LReLU  | 32 x 512 x 512   |
| 3.           | Conv 3 x 3              | LReLU  | 64 x 512 x 512   |
|              | AvgPool                 | -      | 64 x 256 x 256   |
| Model 3 ↓    |                         |        |                  |
| 4.           | Raw RGB images 2        | -      | 3 x 256 x 256    |
|              | Concat/ $\phi_{simple}$ | -      | 67 x 256 x 256   |
|              | MinBatchStd             | -      | 68 x 256 x 256   |
|              | Conv 3 x 3              | LReLU  | 64 x 256 x 256   |
|              | Conv 3 x 3              | LReLU  | 128 x 256 x 256  |
| 5.           | AvgPool                 | -      | 128 x 128 x 128  |
| Model 2 ↓    |                         |        |                  |
| 6.           | Raw RGB images 3        | -      | 3 x 128 x 128    |
|              | Concat/ $\phi_{simple}$ | -      | 131 x 128 x 128  |
|              | MinBatchStd             | -      | 132 x 128 x 128  |
|              | Conv 3 x 3              | LReLU  | 128 x 128 x 128  |
|              | Conv 3 x 3              | LReLU  | 256 x 128 x 128  |
| 7.           | AvgPool                 | -      | 256 x 64 x 64    |
|              | Raw RGB images 4        | -      | 3 x 64 x 64      |
|              | Concat/ $\phi_{simple}$ | -      | 259 x 64 x 64    |
|              | MinBatchStd             | -      | 260 x 64 x 64    |
|              | Conv 3 x 3              | LReLU  | 256 x 64 x 64    |
| 8.           | Conv 3 x 3              | LReLU  | 512 x 64 x 64    |
|              | AvgPool                 | -      | 512 x 32 x 32    |
| Model 1 ↓    |                         |        |                  |
| 9.           | Raw RGB images 5        | -      | 3 x 32 x 32      |
|              | Concat/ $\phi_{simple}$ | -      | 515 x 32 x 32    |
|              | MinBatchStd             | -      | 516 x 32 x 32    |
|              | Conv 3 x 3              | LReLU  | 512 x 32 x 32    |
|              | Conv 3 x 3              | LReLU  | 512 x 32 x 32    |
| 10.          | AvgPool                 | -      | 512 x 16 x 16    |
|              | Raw RGB images 6        | -      | 3 x 16 x 16      |
|              | Concat/ $\phi_{simple}$ | -      | 515 x 16 x 16    |
|              | MinBatchStd             | -      | 516 x 16 x 16    |
|              | Conv 3 x 3              | LReLU  | 512 x 16 x 16    |
| 11.          | Conv 3 x 3              | LReLU  | 512 x 16 x 16    |
|              | AvgPool                 | -      | 512 x 8 x 8      |
| 12.          | Raw RGB images 7        | -      | 3 x 8 x 8        |
|              | Concat/ $\phi_{simple}$ | -      | 515 x 8 x 8      |
|              | MinBatchStd             | -      | 516 x 8 x 8      |
|              | Conv 3 x 3              | LReLU  | 512 x 8 x 8      |
|              | Conv 3 x 3              | LReLU  | 512 x 8 x 8      |
| 13.          | AvgPool                 | -      | 512 x 4 x 4      |
|              | Raw RGB images 7        | -      | 3 x 4 x 4        |
|              | Concat/ $\phi_{simple}$ | -      | 515 x 4 x 4      |
|              | MinBatchStd             | -      | 516 x 4 x 4      |
|              | Conv 3 x 3              | LReLU  | 512 x 4 x 4      |
| 14.          | Conv 4 x 4              | LReLU  | 512 x 1 x 1      |
|              | Fully Connected         | Linear | 1 x 1 x 1        |

Table 2: Discriminator Architecture for the MSG-ProGAN and MSG-StyleGAN Models used in training.

8.86. Because of the huge size of the LSUN bedrooms dataset (30M), we trained it for 150M real images (roughly 5 epochs) which resulted in an FID of 18.32. Figures 6 and 7 show the  $128 \times 128$  (highest resolution) samples generated for the CelebA and LSUN bedrooms datasets respectively. Figure 4 and Fig 5 shows samples generated by the MSG-StyleGAN model at all resolutions on the Oxford Flowers and Cifar-10 datasets respectively. Figure 8 shows additional qualitative results (random samples) from the CelebA-HQ dataset, trained using our *Model full* architecture at  $1024 \times 1024$  resolution.

### 3. Observations

In this section, we present some of our observations and hypotheses about the differences in results generated by our method and StyleGAN. We show an overview of randomly selected samples from both models in Fig 1. In our analysis of the results, we find that while the actual resulting image quality is very close, StyleGAN samples exhibit *slightly* higher variation in terms of pose. In contrast, MSG-StyleGAN results are *slightly* more globally consistent and more realistic. This trade-off between diversity and result quality is widely reported [3], and may explain some of the difference in FID score. Further investigation into methods to control either axis (realism vs diversity), and the impact this has on the FID score, would be an interesting avenue for future work.

We also conducted experiments investigating the role that the pixelwise noise added to each block of the StyleGAN generator plays in image generation. We found that on non-face datasets, these noise layers model *semantic* aspects of the images and not just stochastic variations, as was their initial intent [2] (see Fig 2). We observed that MSG-StyleGAN also shows this type of effect, although to a slightly less degree. We conjecture that this disentanglement between the stochastic and semantic features is more straightforward for the face modelling task (e.g., on CelebA-HQ and FFHQ datasets), and the different models sensitivity to this noise could contribute to some of the the performance differences we observe as well, on face vs non-face datasets.

As mentioned in the discussion section of the main paper, we do not use the mixing regularization technique described in the StyleGAN [2] work (the question of how to integrate such a regularization is an interesting direction for future work). However, we note that in spite of not using it, the model still learns to disentangle high level semantic features of the images due to the scale based constraint (see Fig. 3). As apparent from the figure, the high level mixing is much more coherent and generates more visually realistic results; while lower level mixing often generates incorrect visual cues, such as improper lighting and unbalanced hair. This shows that performance gains might be

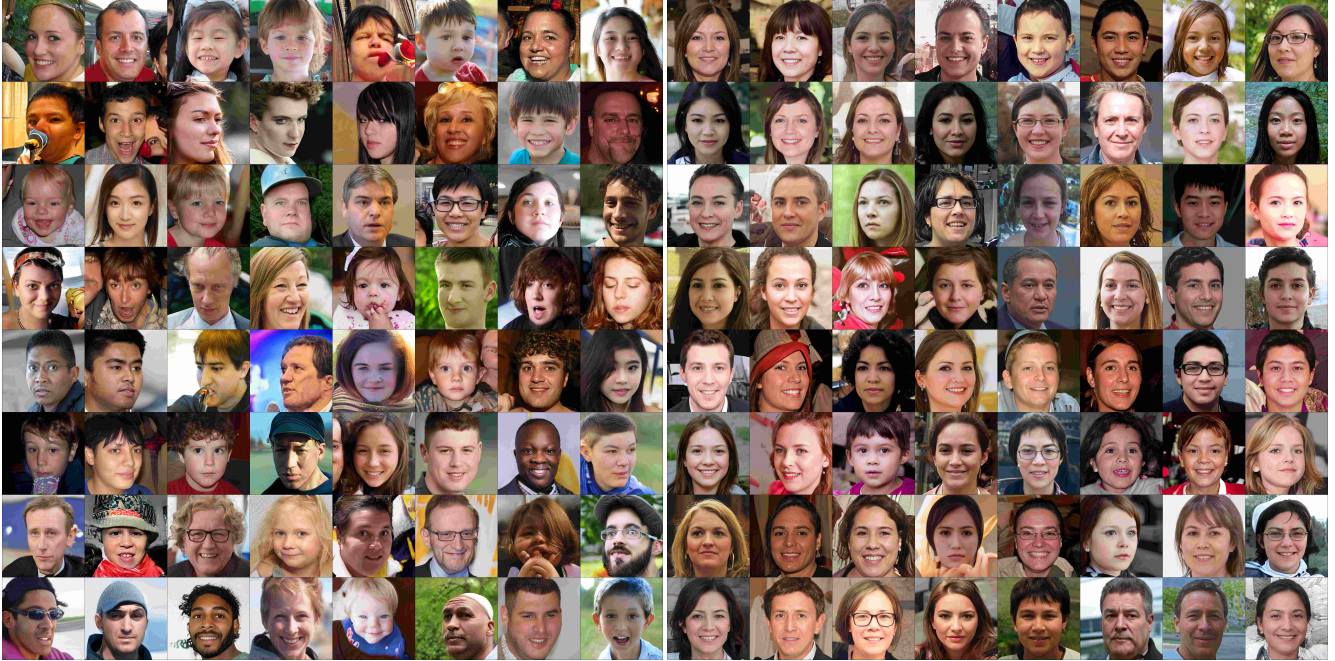

(a) StyleGAN generated images

(b) MSG-StyleGAN generated images

Figure 1: Random generated samples for qualitative comparison between StyleGAN [2] and MSG-StyleGAN. All the samples were generated *without* truncating the input latent space for both because the FID calculation is done on non-truncated latent spaces. Best viewed zoomed in.

possible by ensuring proper style-based mixing at the low (coarse-grained) level of generation.

## References

- [1] Tero Karras, Timo Aila, Samuli Laine, and Jaakko Lehtinen. Progressive growing of GANs for improved quality, stability, and variation. In *ICLR*, 2018. 1
- [2] Tero Karras, Samuli Laine, and Timo Aila. A style-based generator architecture for generative adversarial networks. In *CVPR*, pages 4401–4410, 2019. 1, 2, 3, 5
- [3] Jun-Yan Zhu, Richard Zhang, Deepak Pathak, Trevor Darrell, Alexei A Efros, Oliver Wang, and Eli Shechtman. Toward multimodal image-to-image translation. In *Advances in Neural Information Processing Systems*, 2017. 2



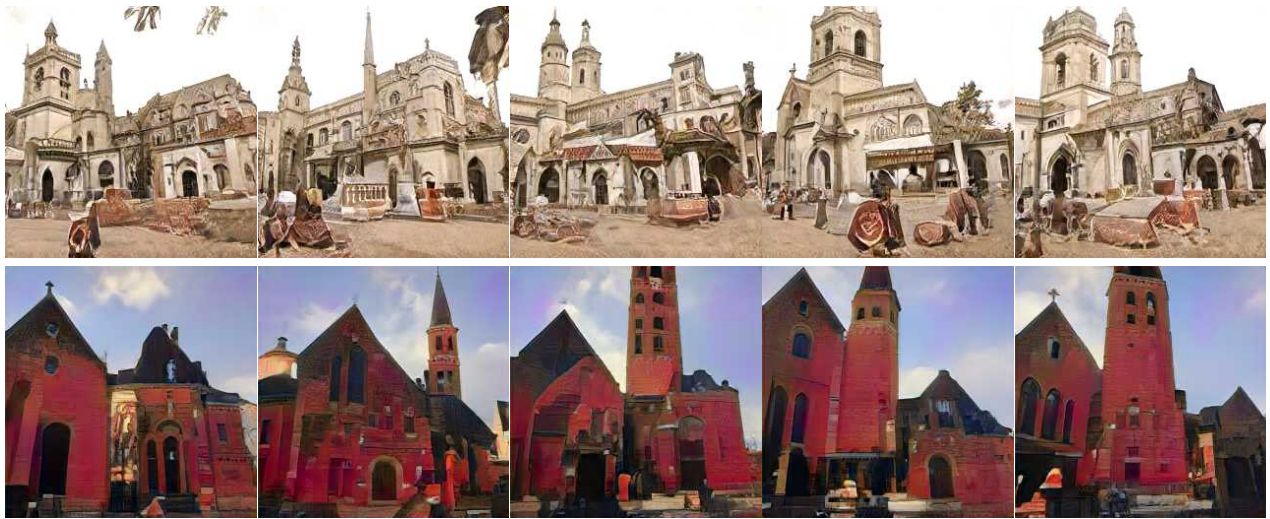

Figure 2: LSUN Church images generated by StyleGAN (top) and MSG-StyleGAN (bottom) using different realizations of the per-pixel noise while keeping the input latent vectors constant.



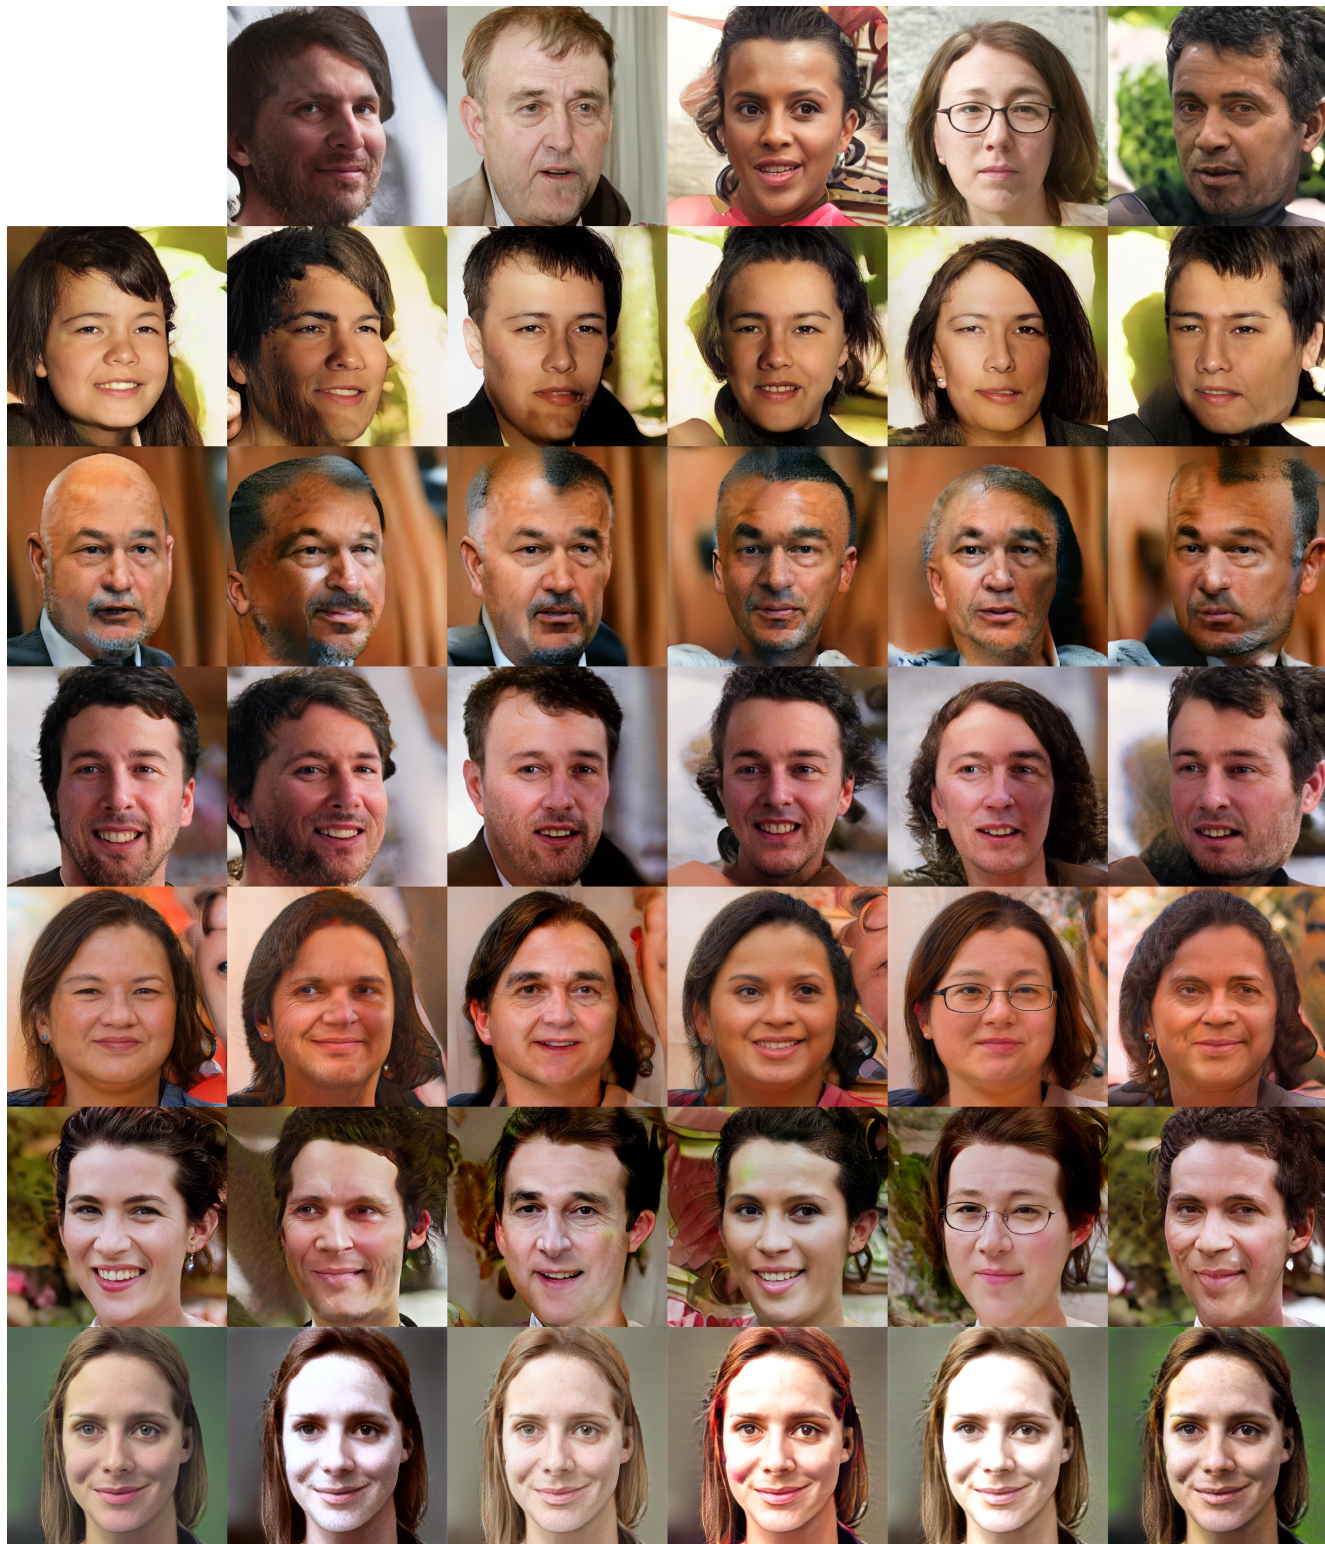

Figure 3: Images generated by mixing the styles coming from two different latent vectors at different levels (granularity) of generation. As in StyleGAN [2], the first column images are source 1 and first row are source 2. Rows numbered 2, 3, and 4 have the mixing at resolutions ( $4 \times 4$  and  $8 \times 8$ ), while rows 5 and 6 at ( $16 \times 16$  and  $32 \times 32$ ), and the row 6 images are generated by swapping the source 2 latents at resolutions ( $64 \times 64$  till  $1024 \times 1024$ ).



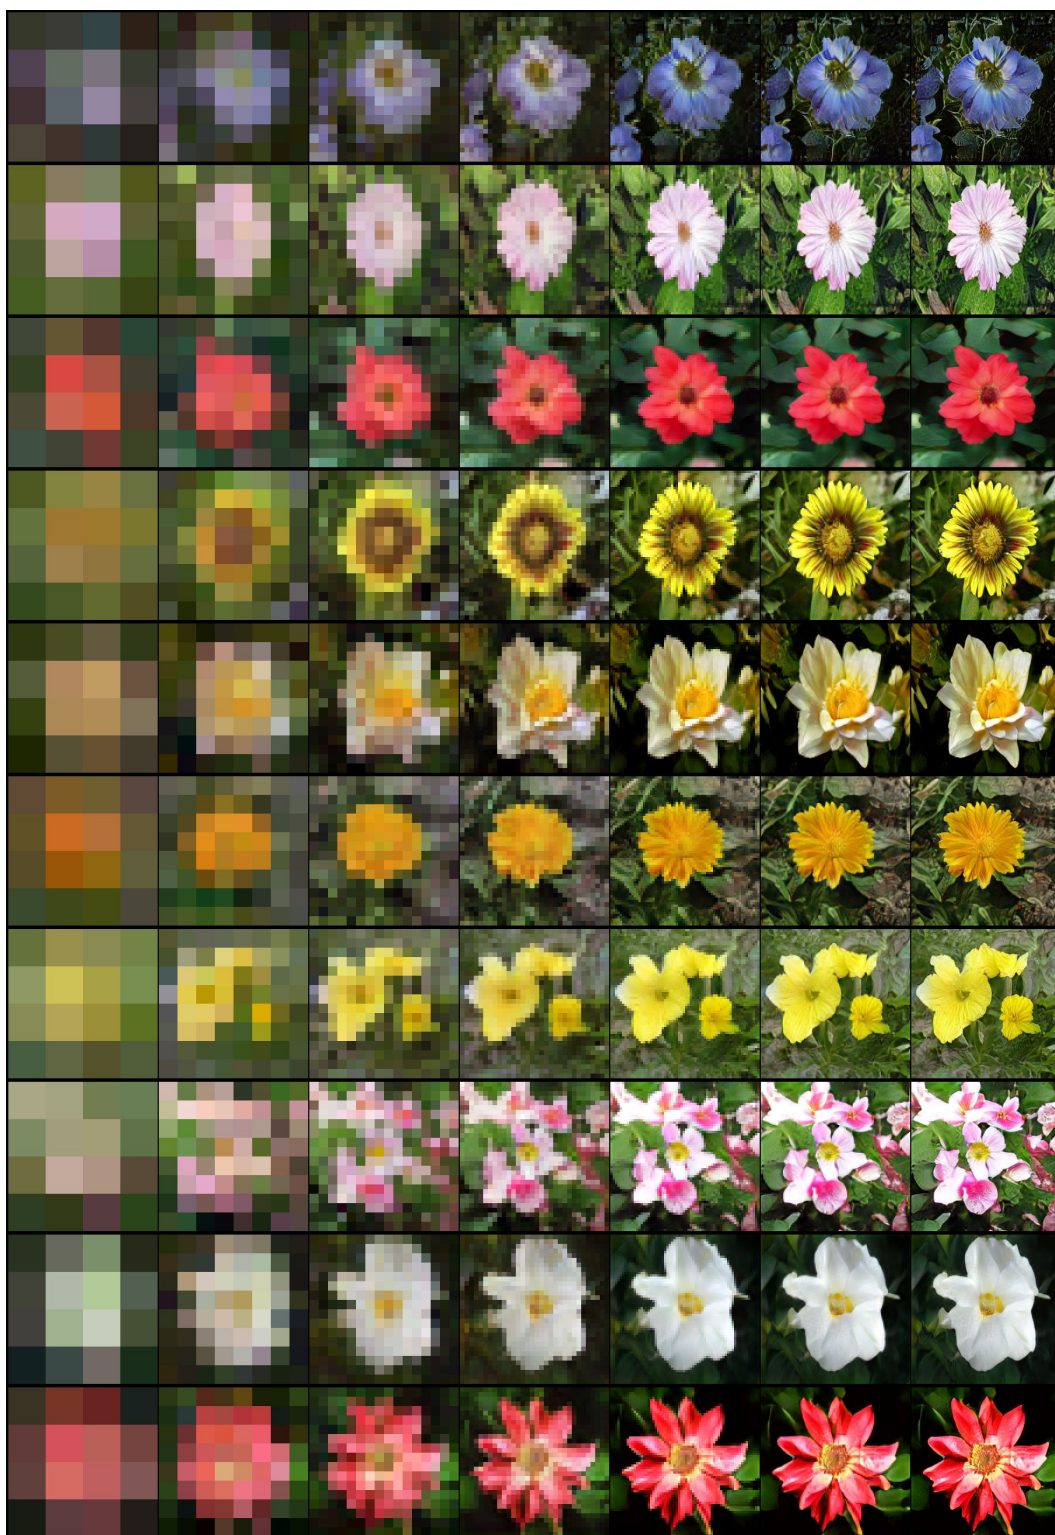

Figure 4: Random samples generated at all 7 resolutions for the Oxford102 flowers dataset.

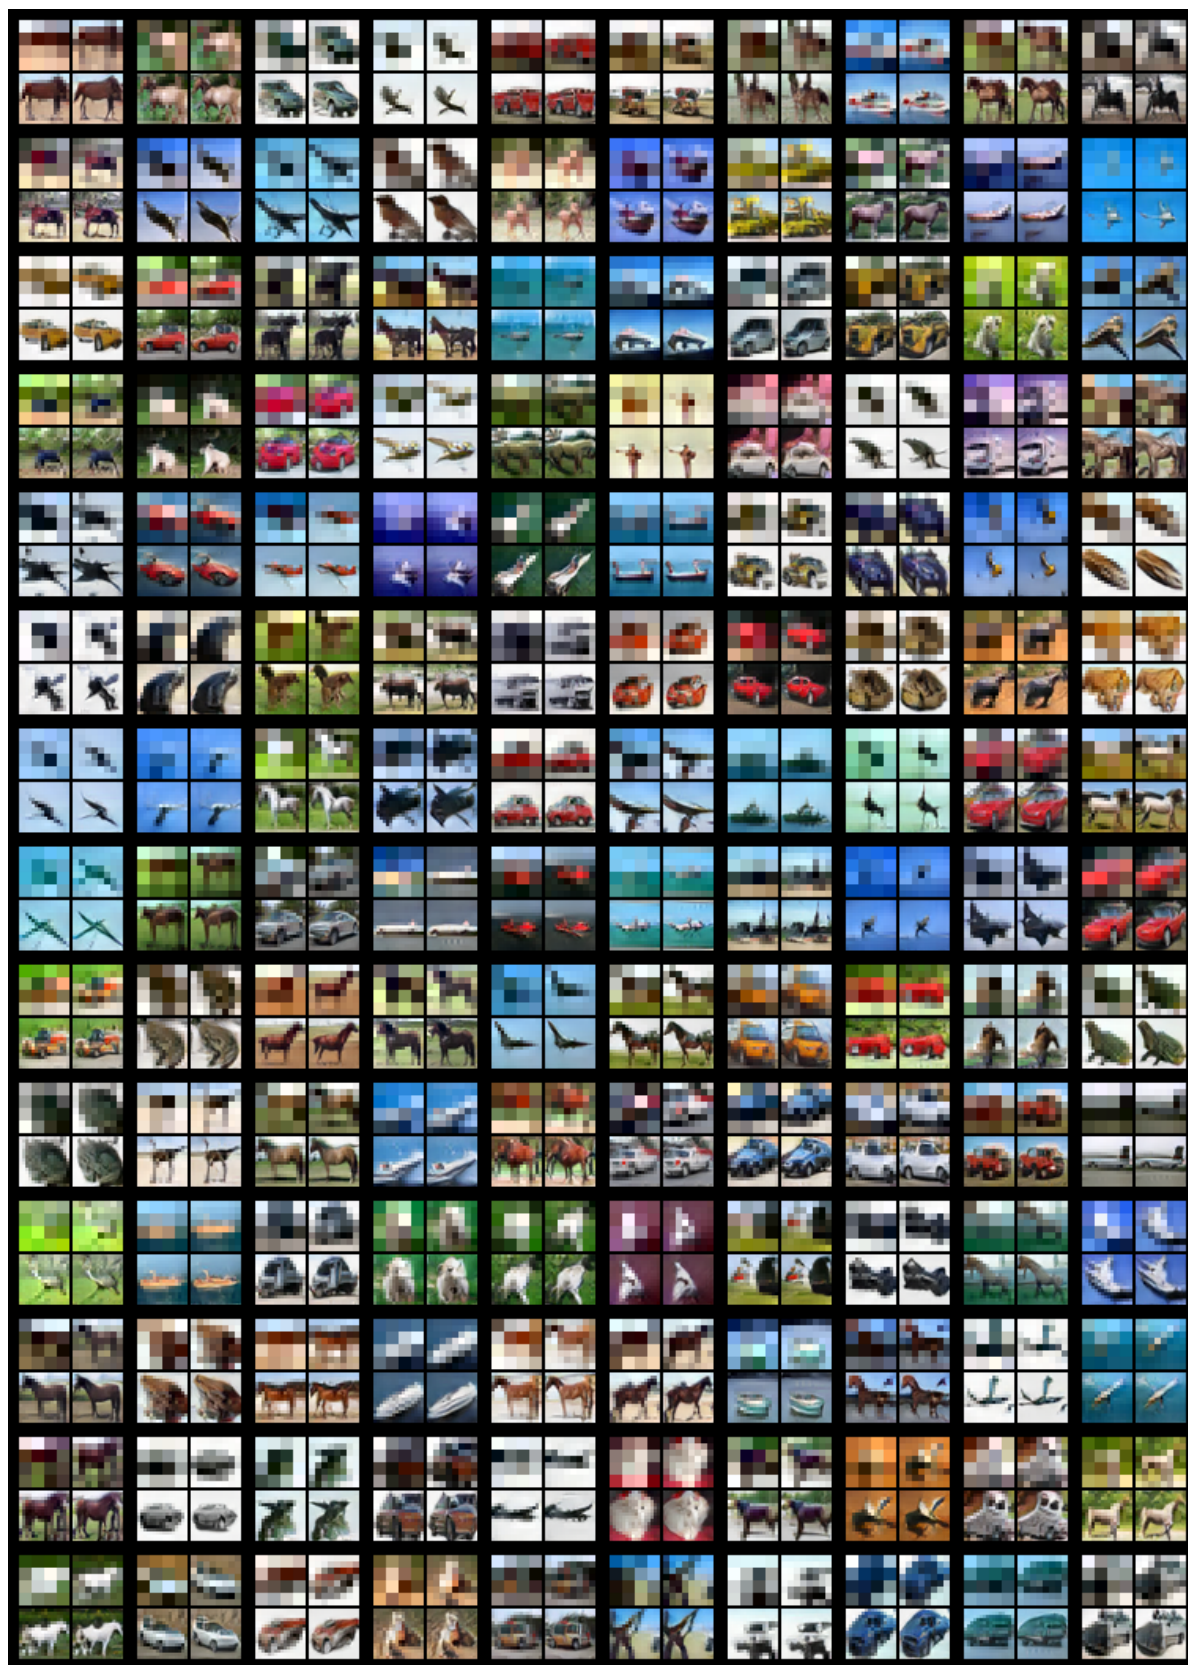

Figure 5: Random samples generated at all 4 resolutions for the CIFAR-10 dataset.



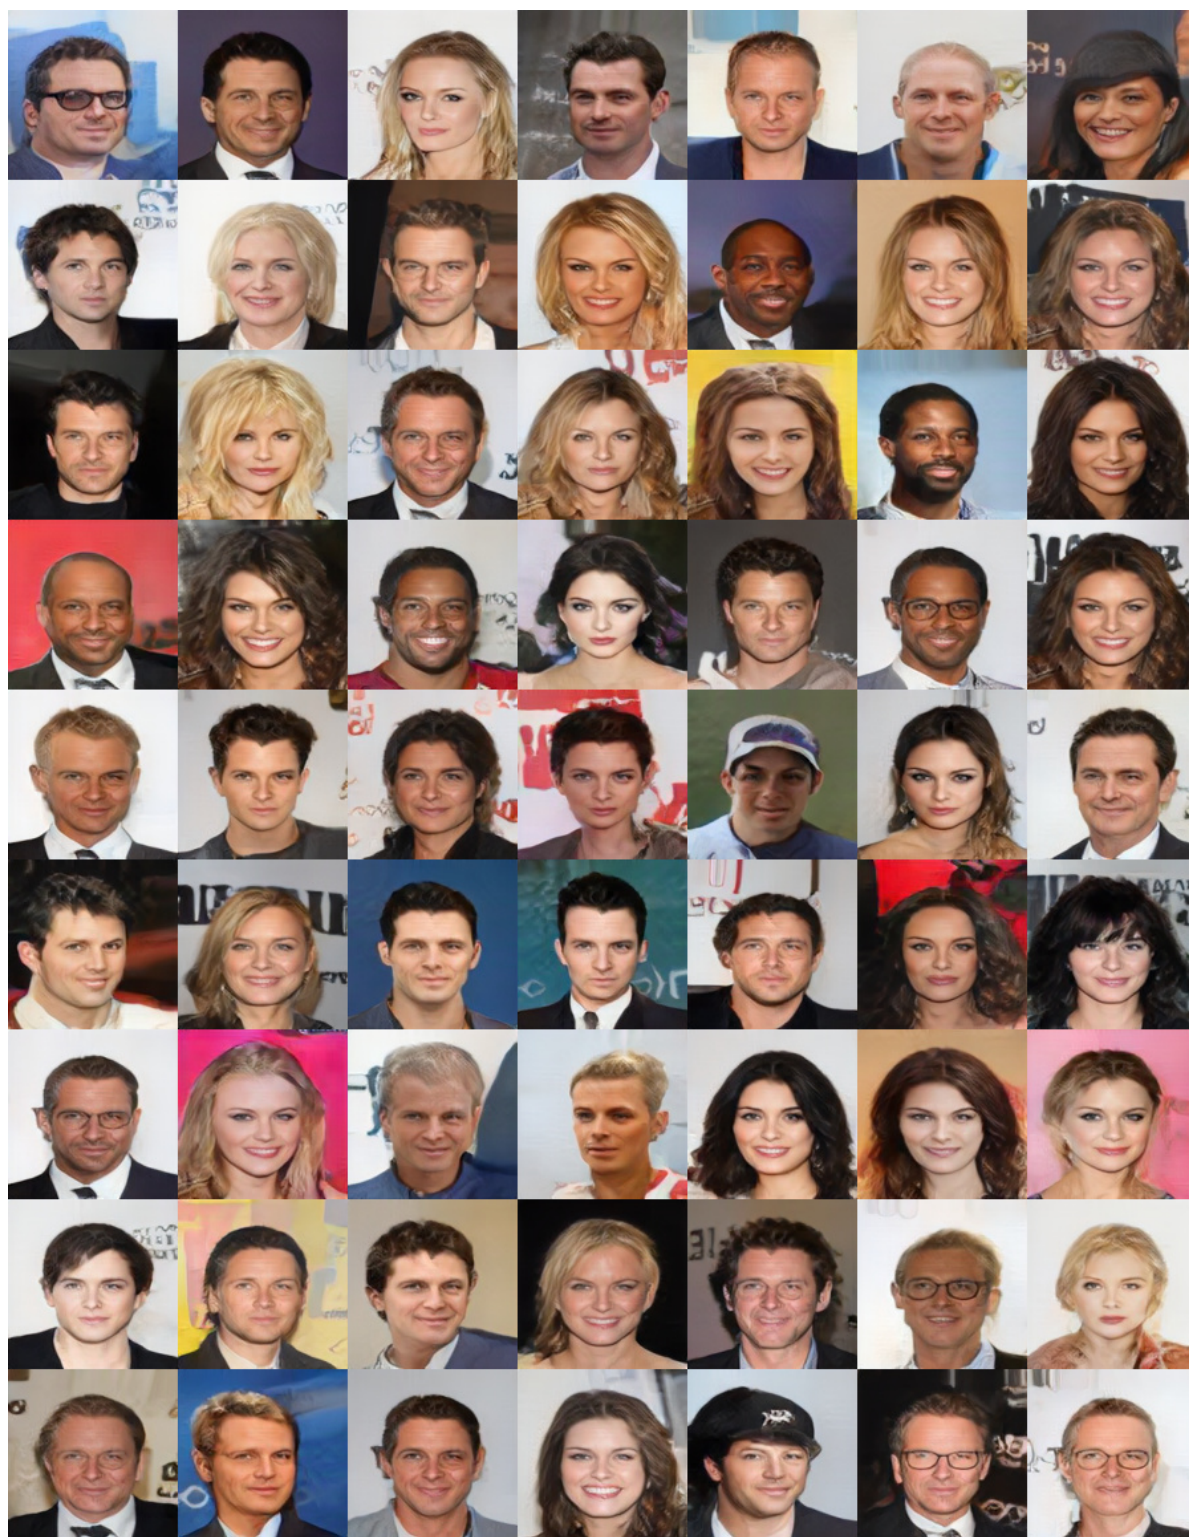

Figure 6: Random generated CelebA Faces at resolution  $128 \times 128$ .



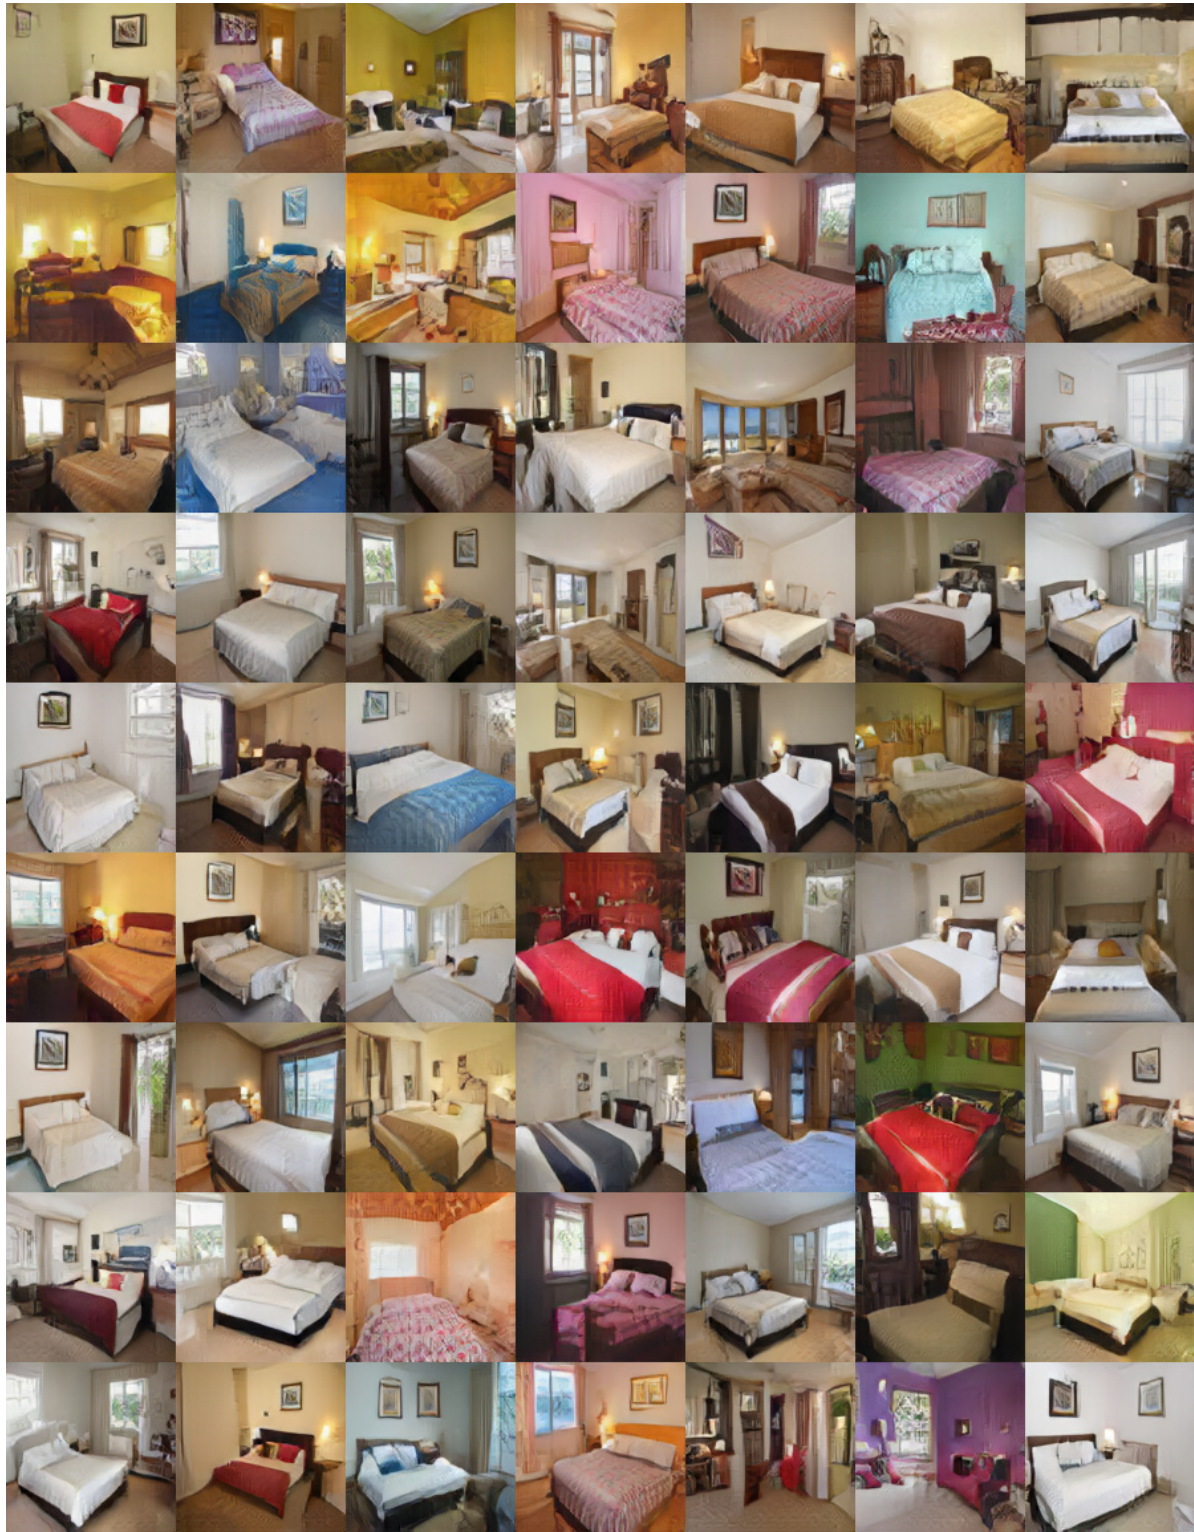

Figure 7: Random generated LSUN bedrooms at resolution  $128 \times 128$ .



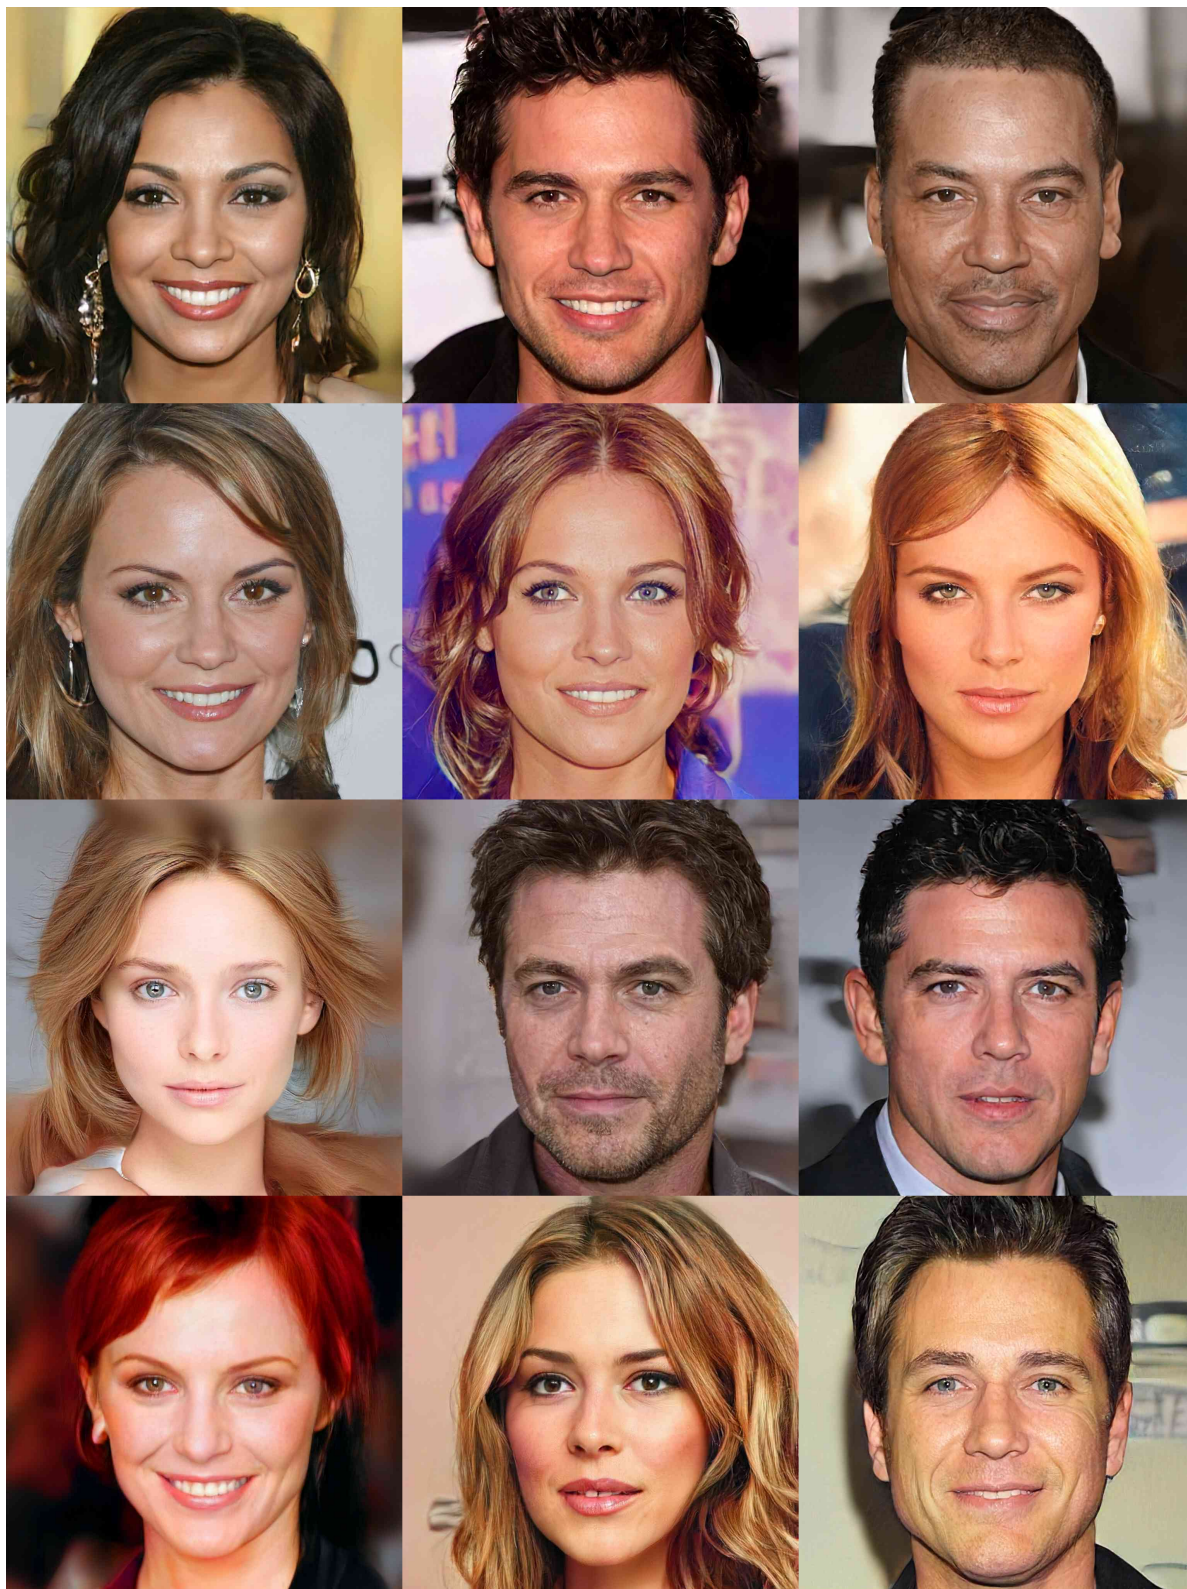

Figure 8: Random generated CelebA-HQ Faces at resolution 1024  $\times$  1024.
